1 expressed rapidly and automatically. This qualitative change appeared to enable  
2 participants to form memories for two opposing perturbations, overcoming  
3 interference effects that typically prohibit savings when learning multiple, opposing  
4 perturbations. Our results are consistent with longstanding theories that frame skill  
5 learning as a transition from deliberate to automatic selection of actions.

6

## 7 **Introduction**

8 Motor learning is often studied using adaptation tasks (Cunningham, 1989; Kluzik et  
9 al., 2008; Krakauer et al., 1999, 2000; Martin et al., 1996a; Shadmehr and Mussa-  
10 Ivaldi, 1994; Welch et al., 1993; Wolpert et al., 1995). In these tasks, a systematic  
11 perturbation is applied during a movement, and participants must learn to adjust  
12 their actions to cancel the effects of the perturbation and regain baseline levels of  
13 performance. The ability to adapt to an imposed perturbation appears to be  
14 supported by at least two underlying learning processes (Huberdeau et al., 2015a).  
15 One is an implicit recalibration process which is known to be cerebellum-dependent  
16 and driven by sensory prediction errors (Mazzoni and Krakauer, 2006; Taylor et al.,  
17 2010). The second process is deliberate compensation for imposed perturbations  
18 through re-aiming of their reaching movements (Fernandez-Ruiz et al., 2011; Haith  
19 et al., 2015; Martin et al., 1996a; Morehead et al., 2015; Taylor et al., 2014).

20

21 Experiencing a particular perturbation multiple times usually results in successful  
22 adaptation in fewer trials, a phenomenon known as *savings* (Brashers-Krug et al.,  
23 1996; Ebbinghaus, 1913; Huang et al., 2011, 2011; Kojima et al., 2004; Lackner and  
24 Lobovits, 1977; Villalta et al., 2013; Zarahn et al., 2008). Reach directions typically

1 revert to baseline with time or when feedback is removed (Joiner and Smith, 2008;  
2 Kitago et al., 2013), leaving savings as the most reliable sign of long-term memory  
3 for prior adaptation. A number of recent studies have shown that savings is not  
4 attributable to faster implicit recalibration (as suggested by (Herzfeld et al., 2014)),  
5 but is instead solely attributable to more effective deliberate re-aiming (Hadjiosif  
6 and Smith, 2013; Haith et al., 2015; Morehead et al., 2015), likely through retrieval  
7 of a previously successful re-aiming strategy (Haith and Krakauer, 2014; Huberdeau  
8 et al., 2015b). These results suggest, puzzlingly, that long-term memory for  
9 adaptation is represented as a memory that must be expressed deliberately, rather  
10 than as a motor memory, which we would expect to be expressed automatically.

11

12 This conclusion that savings is deliberate seems incongruent with everyday  
13 experience acting under perturbed mappings (e.g. wearing eye-glasses), and also  
14 with classical observations that people can readily switch between different  
15 perturbation environments given enough experience (Martin et al., 1996a; Welch et  
16 al., 1993). It seems implausible that the ability to perform under such conditions  
17 could remain purely deliberate. A critical difference in these cases from those in  
18 which savings has been shown to be deliberate (Haith et al., 2015; Huberdeau et al.,  
19 2015b; Morehead et al., 2015) is that they involved repeated practice with the  
20 perturbed visual feedback. Theories of skill learning that posit that practice  
21 promotes a transition from deliberate processes to automaticity (Anderson, 1982;  
22 Ashby and Crossley, 2012; Fitts, Paul M., 1964) could therefore be the key to

1 understanding savings. Specifically, might a deliberate re-aiming strategy become  
2 automatic with practice?

3

4 We sought to test the hypothesis that sustained practice would lead to savings being  
5 transformed from deliberate to automatic expression. Human participants adapted  
6 to a series of alternating perturbations over two days. It is known that deliberate re-  
7 aiming can be prohibited early in adaptation by limiting the amount of preparation  
8 time (PT) allowed prior to movement (Fernandez-Ruiz et al., 2011; Haith et al.,  
9 2015; Leow et al., 2017a, 2017b). We hypothesized that, if savings became  
10 supported by an automatic process, it would become expressible even when  
11 preparation time was limited.

12

13 An alternative way that practice might improve performance is if it leads to changes  
14 in the sensitivity to error of implicit recalibration (Gonzalez Castro et al., 2014;  
15 Herzfeld et al., 2014). We assessed potential changes in implicit recalibration using  
16 Aftereffect trials, which are uninfluenced by deliberate re-aiming (Benson et al.,  
17 2011; Morehead et al., 2015; Taylor et al., 2014; Werner et al., 2015). If a  
18 transformation occurs in the representation of savings from deliberate to automatic,  
19 then it should be evident even when preparation time is limited. In addition, the  
20 effect of limiting preparation time should dissociate from Aftereffect trials. If,  
21 instead, practice alters the error-sensitivity of implicit recalibration, then Aftereffect  
22 trials and Short-PT trials should remain congruent.

23

24

## 1 **Results**

### 2 *Limited expression of learning in Short-PT and Aftereffect trials during the initial* 3 *rotation cycle*

4 Based on prior studies, we expected that limiting preparation time, as was imposed  
5 in Short-PT trials (Figure 1a), would lead to reduced expression of learning during  
6 the initial few trials of adaptation (Figure 1b-c) (Fernandez-Ruiz et al., 2011; Haith  
7 et al., 2015; Leow et al., 2017b). We also expected that explicitly instructing  
8 participants to withhold any deliberate re-aiming strategy (as was done for  
9 Aftereffect trials; Figure 1d) would have a similar effect (Benson et al., 2011;  
10 Morehead et al., 2015; Werner and Bock, 2010). This was indeed the case (Figure 2a  
11 & b). During the first few trials after onset of the rotation (trials 2-8), average reach  
12 angles were different across the three trial types (Long-PT trials, Short-PT trials,  
13 and Aftereffect trials; one-way ANOVA:  $F(2) = 3.55$ ,  $p < 0.05$ ). Post-hoc comparisons  
14 confirmed that compensation during this period was significantly less in Short-PT  
15 trials than in Long-PT trials ( $t = 4.31$ ,  $p < 0.001$ ), though the difference in reach  
16 direction between Aftereffect trials and Long-PT trials was not significant ( $t = 1.89$ ,  
17  $p = 0.077$ ). Behavior did not differ significantly between the Short-PT and  
18 Aftereffect trials ( $t = 1.57$ ,  $p = 0.14$ ). This analysis therefore confirmed that limiting  
19 preparation time reduced the amount of compensation during early learning, but  
20 was inconclusive about whether behavior in Aftereffect trials differed from that in  
21 Long-PT trials.

Figure 1

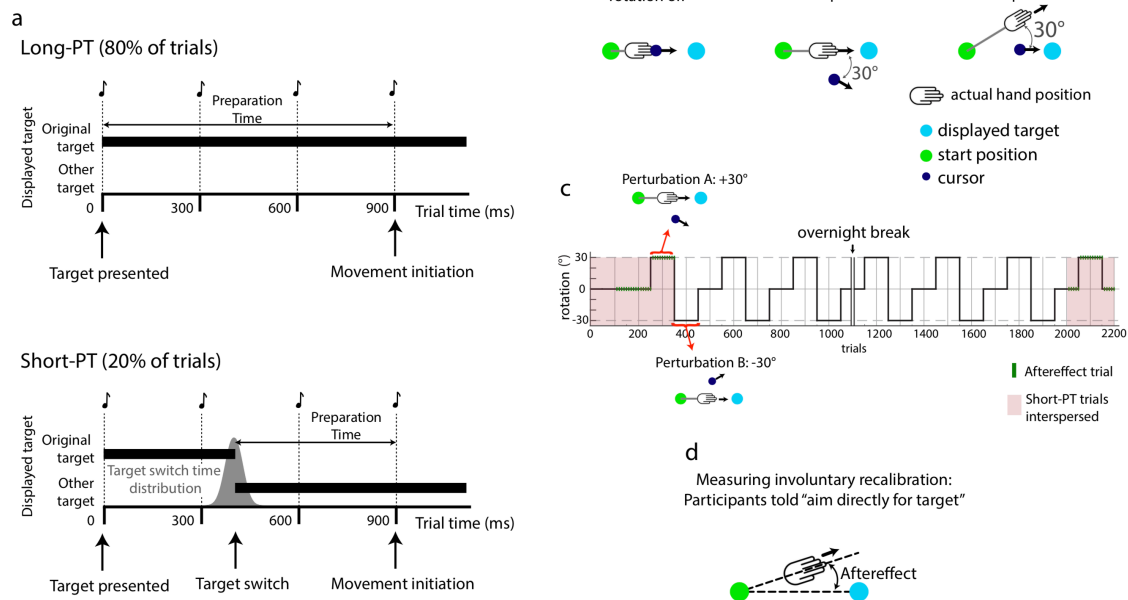

1

2 Figure 1: Experiment Design. Participants engaged in a reaching task. (a) Participants were  
 3 required to initiate movement coincident with the fourth tone of a metronome. In the majority  
 4 of trials (Long-PT trials, top panel), the target remained in place. In a subset of trials (Short-PT,  
 5 lower panel), the target switched locations, from left to right or from right to left, just prior to  
 6 the fourth beep, limiting allowed preparation time. (b) A rotation of the cursor path was  
 7 imposed, requiring participants to adjust their movement direction relative to the target. (c) The  
 8 direction of the rotation was varied in repeating cycles of two opposing rotation directions  
 9 throughout a two-day experiment. (d) Aftereffect trials, in which participants were instructed to  
 10 disengage any deliberate aiming strategy and “aim directly for the target”. Placement of  
 11 Aftereffects trials within each cycle shown as green bars in (c).  
 12

13 One problem with comparing learning across trial types within a fixed window of  
 14 trials is that Aftereffect trials consistently occurred later in the block than the  
 15 equivalent Short-PT trials. Thus, more learning was likely to have accrued prior to  
 16 each Aftereffect trial than the other trial types, potentially masking a difference in  
 17 behavior in these trials. We therefore conducted a finer-grained analysis that  
 18 compared reach direction for each Short-PT or Aftereffect trial to the average reach  
 19 direction for each of the two nearest-neighbor Long-PT trials (though excluding  
 20 trials immediately following an Aftereffect trial; see below for justification as to

1 why). This comparison reconfirmed the effect of limiting preparation time on extent  
2 of overall compensation (Short-PT vs Long-PT trials;  $t = 4.49$ ,  $p < 0.001$ ), and also  
3 revealed a significant difference in behavior between Aftereffect trials and regular,  
4 Long-PT trials (Aftereffect trials vs Long-PT trials;  $t = 5.42$ ,  $p < 0.001$ ).

5  
6 We also examined behavior in each trial type at asymptote (trials 34 – 40). Here,  
7 there was also a significant difference among the trial types (one-way ANOVA:  $F(2)$   
8  $= 6.42$ ,  $p < 0.01$ ), with a significant difference between Long-PT and Aftereffect trials  
9 ( $t = 4.20$ ,  $p < 0.001$ ) and between Long-PT and Short-PT trials ( $t = 5.34$ ,  $p < 0.001$ ),  
10 but not between Aftereffect and Short-PT trials ( $t = 0.103$ ,  $p = 0.92$ ).

11  
12 Thus, consistent with previous findings (Benson et al., 2011; Haith et al., 2015; Leow  
13 et al., 2017b; Morehead et al., 2015; Taylor et al., 2014), removing the influence of  
14 an aiming strategy during the first exposure to the perturbation, either by limiting  
15 preparation time (Short-PT trials) or by instruction (Aftereffect trials), significantly  
16 diminished the extent of compensation, particularly during early learning,  
17 confirming that participants compensated for the perturbation using a combination  
18 of deliberate re-aiming and implicit recalibration.

19

#### 20 *Reversion toward baseline following Aftereffect trials*

21 We noted that, in Long-PT trials that immediately followed Aftereffect trials, the  
22 reach direction was, on average, nearer to baseline compared to the Long-PT trial  
23 preceding the Aftereffect trial (Supplemental Figure 1; Cycle 1:  $t = 4.87$ ,  $p < 0.001$ ;

1 Cycle 7:  $t = 5.21$ ,  $p < 0.001$ ). This effect was similar to those in previous studies  
2 showing that when adaptation is interrupted by a period of inactivity, the next reach  
3 following the interruption is closer to baseline than the reach prior to the  
4 interruption (Day and Singer, 1967; Hadjiosif and Smith, 2013; Morehead et al.,  
5 2015). Adaptation did, however, appear to recover rapidly in the subsequent trials.  
6 For this reason, post-Aftereffect trials (which, by design, were always Long-PT  
7 trials) were excluded from all analyses.

8

9 *Practice enabled savings for opposite rotations*

10 During the course of the experiment, the direction of the cursor rotation periodically  
11 alternated between “rotation A” ( $30^\circ$  or  $-30^\circ$ , counterbalanced across participants),  
12 to “rotation B” ( $-30^\circ$  or  $30^\circ$ ), and finally to “null” ( $0^\circ$ ) (Figure 1c). Participants  
13 successfully adapted to both rotation directions (Figure 2a), and gradually improved  
14 the rate at which they adapted across cycles (rotation A, Cycle 7 vs. cycle 1:  $t = 4.24$ ,  
15  $p < 0.001$ ; rotation B:  $t = 3.88$ ,  $p < 0.01$ ). Critically, this improvement was not  
16 attributable to differences in baseline at the start of each cycle, which was well-  
17 matched across cycles for all three trial types (First cycle vs. Last cycle; Long-PT:  $t =$   
18  $0.687$ ,  $p = 0.50$ ; Short-PT:  $t = 0.0253$ ,  $p = 0.98$ ; and Aftereffect:  $t = 0.366$ ,  $p = 0.72$ ).  
19 Thus, following repeated exposures, participants were able to adapt to the  
20 alternating rotations and exhibited savings (faster learning) for both rotation  
21 directions when preparation time was long.



Figure 2

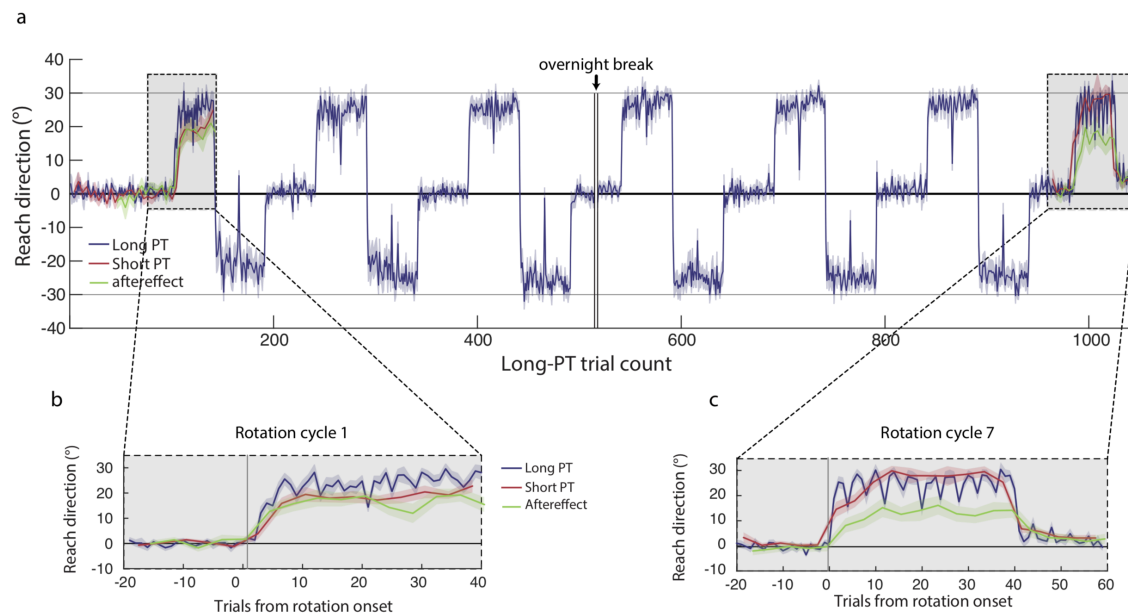

1

2 Figure 2: Experiment 1 Results. (a) Mean reach direction ( $\pm$  s.e.m.) across participants  
3 throughout the whole experiment. Blue: Long-PT trials; red: Short-PT trials; green: Aftereffect  
4 trials. Note that both Short-PT and Aftereffect trials were only present during the first and last  
5 cycle). (b) Enlarged view of mean behavior during Cycle 1. (c) Enlarged view of mean behavior  
6 during Cycle 7.

7

8 *The rate of implicit recalibration was not altered by practice*

9 In order to determine which components of learning supported the savings seen  
10 following repeated practice, we re-introduced the probe trials (Aftereffect trials and  
11 Short-PT trials) in the final perturbation cycle (Figure 1c). Despite the strong  
12 savings seen in regular, Long-PT trials, performance in Aftereffect trials did not  
13 improve during the seventh cycle compared to the first cycle (Figure 3a & b; rate:  $t =$   
14 2.08,  $p = 0.052$ ; asymptote:  $t = 2.48$ ,  $p < 0.05$ ). Implicit recalibration was actually  
15 marginally slower in the final cycle compared to the first. Thus, repeated practice  
16 had little effect on the rate of implicit recalibration and certainly could not account  
17 for the savings expressed in Long-PT trials.

1

2 By contrast, repeated practice significantly improved performance in trials in which  
3 preparation time was limited. The amount of learning expressed in Short-PT trials  
4 during initial adaptation to rotation A increased significantly from the first cycle to  
5 the seventh cycle (rate:  $t = 2.84$ ,  $p < 0.05$ ; asymptote:  $t = 5.23$ ,  $p < 0.001$ ). There was  
6 also a significant interaction among the three trial types for adaptation rate (Figure  
7 3b; 2-way ANOVA interaction:  $F(2) = 1.85$ ,  $p < 0.05$ ).

8

9 In summary, we found that the implicit recalibration did not change despite  
10 extensive practice adapting to a perturbation. Practice did, however, lead to a  
11 qualitative change in the nature of the memory for adaptation, apparent in the fact  
12 that participants were able to express more of their learning when preparation time  
13 was limited, suggesting a transition from a computationally expensive deliberate  
14 process to one that was automatic.

15

### 16 *Savings under limited preparation time emerged gradually with practice*

17 The results of Experiment 1 suggested that repeated exposure to a perturbation led  
18 to a qualitative change in behavior, with faster, more automatic compensation.  
19 However, because we only probed during the first and the final cycles, we were  
20 unable to determine the time-course over which this change occurred. We therefore  
21 conducted another experiment, Experiment 2, in which Short-PT trials were  
22 included throughout the experiment in order to determine the time-course over  
23 which this transition occurred (Figure 4a).

24

Figure 3

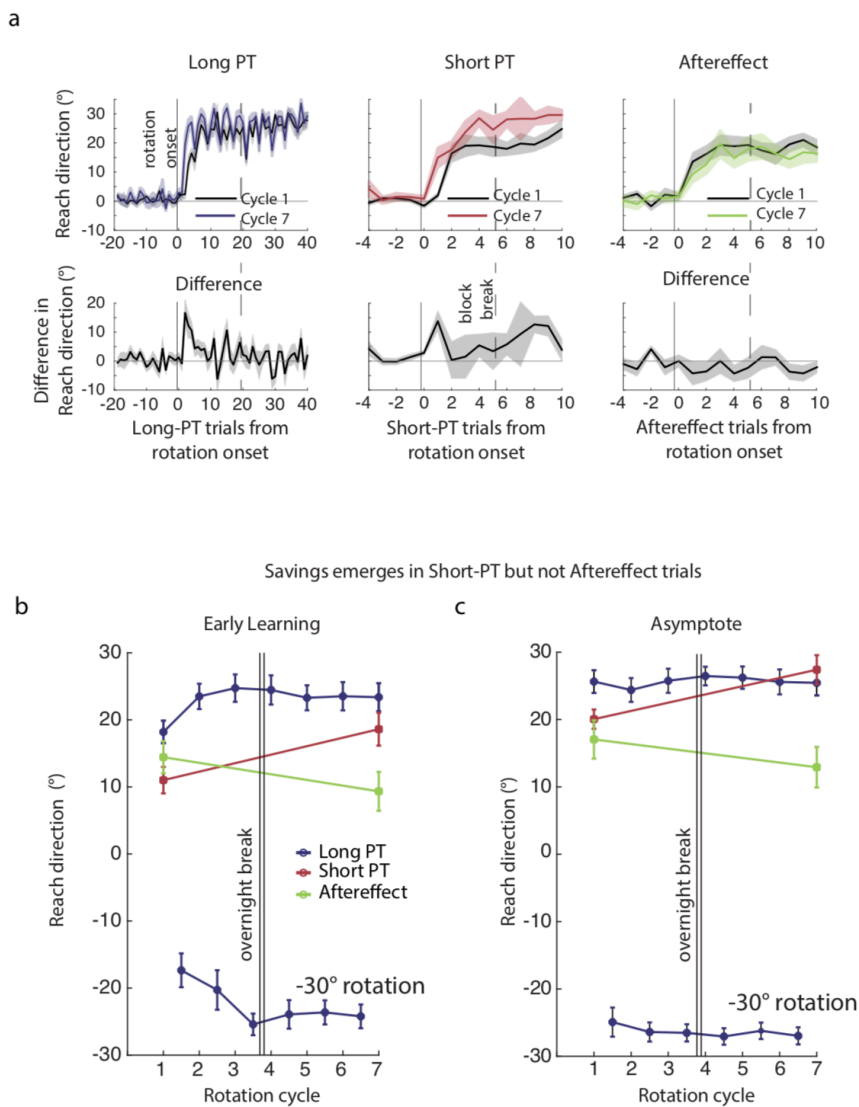

1 Figure 3: Effects of practice on rate of adaptation in Experiment 1. (a) Comparison of mean  
 2 behavior across participants between Cycle 1 (gray) and Cycle 7 (colored) for each trial type.  
 3 Lower set of panels in (a) show the mean difference in performance across cycles for each trial  
 4 type. A positive difference indicates savings. (b) Extent of compensation early after perturbation  
 5 onset (trials 2 – 8 following rotation onset) for each cycle. Lower blue line indicates early  
 6 compensation during Long-PT trials following onset of perturbation B within each cycle.  
 7 Behavior for Short-PT (red) and Aftereffect (green) trials was only measured in Cycles 1 and 7.  
 8 (c) As (b), but showing asymptotic compensation (trials 32 – 40 following rotation onset) within  
 9 each cycle.

10

1 Behavior during the first rotation cycle paralleled that of Experiment 1. Limiting  
2 preparation time led to a significant reduction in compensation during the first few  
3 trials following rotation onset (Figure 4b;  $t = 4.17$ ,  $p < 0.001$ ). When the imposed  
4 perturbation switched direction (from perturbation A to B), compensation in Short-  
5 PT trials continued to lag that in Long-PT trials ( $t = 3.84$ ,  $p < 0.01$ ).

Figure 4

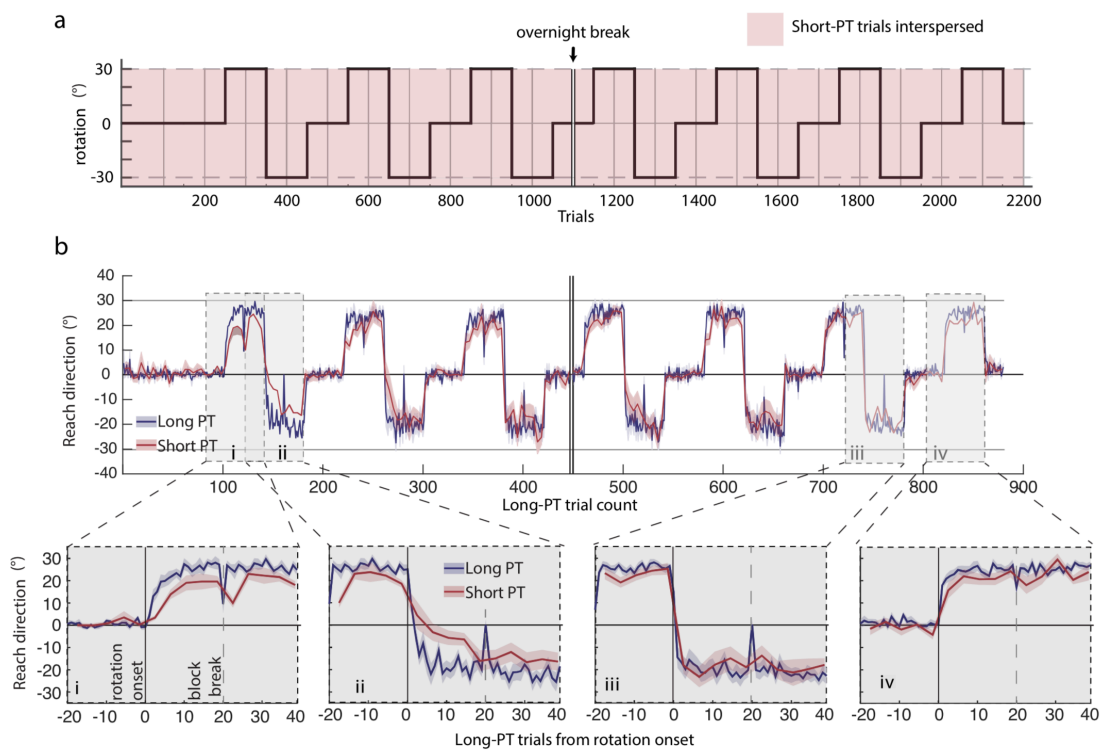

6  
7 Figure 4: Results for Experiment 2. (a) Participants adapted to the same repeating set of  
8 rotations as in Experiment 1, but with Long- and Short-PT trials included throughout all cycles  
9 (and no Aftereffect trials) (b). Average behavior in Long-PT (blue) and Short-PT (red) trials  
10 through the whole experiment. Lower panels show enlarged view of behavior during (i) the  
11 onset of perturbation A during Cycle 1, (ii) the transition from perturbation A to perturbation B  
12 during Cycle 1 (iii), the last transition from perturbation A and perturbation B, which occurred  
13 in Cycle 6 (iv), and the onset of perturbation A in Cycle 7.  
14  
15  
16 As in Experiment 1, Long-PT trials exhibited savings between the first and seventh  
17 cycles of rotation A ( $t = 4.95$ ,  $p < 0.001$ ). A similar savings effect was evident in  
18 Short-PT trials (Figure 5a;  $t = 3.10$ ,  $p < 0.05$ ). To determine whether the

1 development of savings expressed in Long-PT and Short-PT trials followed a similar  
2 time-course across the seven cycles of the rotation, we conducted a linear two-way  
3 mixed-effects analysis. This analysis showed no interaction affect between cycle and  
4 trial type, suggesting that the development of savings followed a similar time-course  
5 in the Long-PT and Short-PT trials (Figure 5b & c; cycle-by-trial type interaction for  
6 rate:  $X^2(1) = 1.95$ ,  $p = 0.16$ ; and for asymptote:  $X^2(1) = 0.27$ ,  $p = 0.60$ ).

7 Short-PT probe trials following the transition to rotation B revealed an even more  
8 dramatic savings effect from practice across cycles of the rotation (Figure 5d). In  
9 Long-PT trials, participants exhibited modest improvements in their rate of  
10 adaptation to perturbation B (Figure 5e;  $t = 3.21$ ,  $p < 0.01$ ), exactly as we had found  
11 in Experiment 1. In Short-PT trials, by contrast, participants struggled to  
12 compensate during the first perturbation cycle, but by the final cycle the response to  
13 the rotation was not detectably different from Long-PT trials (Figure 5e;  $t = 0.82$ ,  $p =$   
14  $0.42$ ). A mixed effects model found a significant interaction between cycle and trial  
15 type for rotation B over the first few trials (Figure 5e;  $\chi^2(1) = 13.7$ ,  $p < 0.001$ ),  
16 although not significantly for asymptote (Figure 5f;  $\chi^2(1) = 1.85$ ,  $p = 0.17$ ).

17 In summary, the results of Experiment 2 show that the improvements in  
18 performance during Short-PT trials emerged gradually with practice and, at least for  
19 rotation B, differently from Long-PT trials.

Figure 5

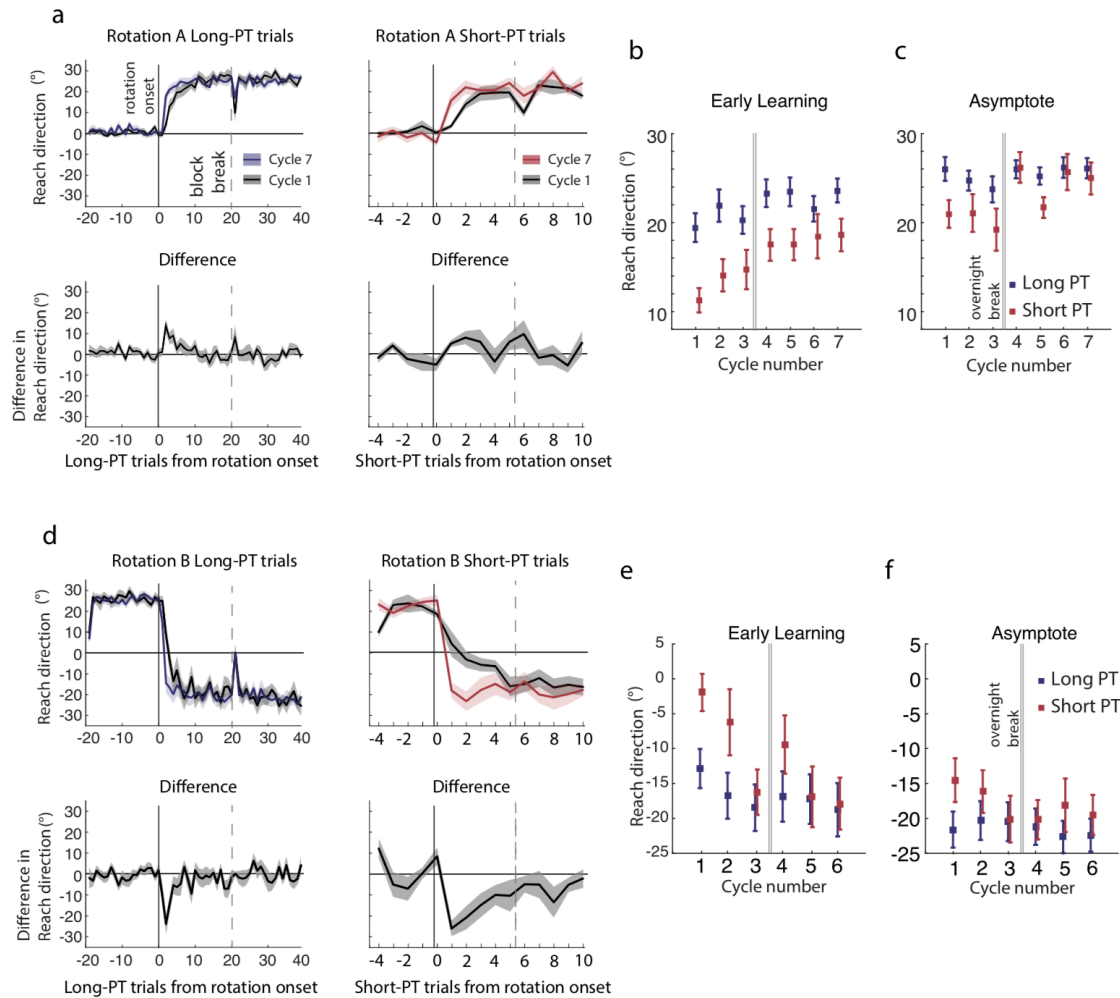

1

2 Figure 5: Effects of practice on the time course of adaptation in Experiment 2. (a) Mean behavior  
 3 across participants within Cycle 1 (gray) and Cycle 7 (color) for both trial types. Lower panels  
 4 show mean difference in performance across cycles. (b) Mean performance early after onset of  
 5 perturbation A (trials 2-8), across cycles for Long-PT (blue) and Short-PT (red) trials. (c), as (b)  
 6 but for mean performance at asymptote (trials 32-40) under perturbation A within each cycle.  
 7 (d-f), as (a-c), but showing behavior under perturbation B within Cycles 1 and 6 (d) and across  
 8 cycles (e,f).  
 9

10

11

12

## 1 **Methods**

### 2 *Experiment Participants*

3 41 right-handed participants with no known neurological impairments took part in  
4 this study (18 – 40 years old, 25 women). The study was approved by the Johns  
5 Hopkins University School of Medicine Institutional Review Board.

6

### 7 *Experimental Setup*

8 Participants were seated at a glass-surfaced table with their right forearm  
9 supported by a splint that allowed nearly frictionless planar arm movement.

10 Participants' arms were obstructed from their own view by a mirror, on which was  
11 projected a display from a downward-facing LCD monitor installed above the mirror  
12 (60 Hz refresh rate; LG).

13

14 Each participant's hand position was recorded by a Flock of Birds magnetic sensor  
15 (130 Hz; Ascension Inc., Shelburne, VT) placed under each participant's index finger.

16 Hand position was reported to participants in near real-time via a cursor (a filled  
17 blue circle, diameter 0.5 cm) displayed on the screen. Visual feedback of the cursor  
18 had a delay of approximately 100 ms (40 ms delay in the Flock of Birds and an  
19 approximately 60 ms delay in the visual display).

20

### 21 *Experiment 1*

22 21 participants took part in Experiment 1, although two were excluded from  
23 analysis because more than 50% of their Short-PT trials were directed towards the

1 wrong target. Participants made rapid “shooting” movements using their right arm  
2 from a central start location (a solid green circle, diameter 1 cm) through a target (a  
3 solid light-blue circle, diameter 1 cm). The target could appear at one of two  
4 locations, positioned 8 cm either to the right or left of the start location. Participants  
5 were trained to initiate their reaching movement coincident with the fourth of four  
6 audible tones (Figure 1a). The tone sequence began 200 ms following steady  
7 placement of the cursor inside the start marker. Successive tones were played at  
8 intervals of 300 ms. On each trial, one of the two targets was presented at the onset  
9 of the first tone. During Long-PT trials, the initially-presented target remained on  
10 the screen either until the participant reached 9 cm radially from the start position,  
11 or 2.5 s passed from the time of the first tone. For Short-PT trials, the target abruptly  
12 switched sides at a variable time prior to the fourth ring tone (Figure 1a), and  
13 remained there for the duration of the trial as with Long-PT trials.

14

15 A visuomotor perturbation in the form of a  $\pm 30^\circ$  rotation of the path of the cursor  
16 about the start position (Figure 1b) was applied to movements directed towards the  
17 right half of the workspace in repeating cycles throughout the experiment (Figure  
18 1c). Leftward-directed movements had no rotation at any time throughout the  
19 experiment. Trials with rightward-directed movements and trials with leftward-  
20 directed movements were pseudorandomly interleaved throughout each cycle. Each  
21 cycle included 150 trials of rightward-directed, and 150 trials of leftward-directed,  
22 movements. The rotation schedule was 50 trials of null rotation, 50 trials of rotation  
23 A, and 50 trials of rotation B. The direction of the cursor rotation under rotation A



1 and B was counter-balanced across participants in the experiment. 11 participants  
2 had rotation A as a clockwise rotation, and 10 participants had it as a  
3 counterclockwise rotation. Seven cycles were included across the duration of the  
4 experiment. The seventh cycle omitted rotation B. The experiment was divided into  
5 blocks of 100 total trials (grey vertical lines in Figure 1c), with brief breaks in  
6 between blocks, plus an overnight break between cycles 3 and 4. Changes in the  
7 rotation occurred in the middle of blocks.

8

9 We included three different types of trials to probe participants' mode of  
10 compensation for the perturbation. The majority of trials were designated as long-  
11 preparation-time (Long-PT) trials. In these trials, the target remained in its original  
12 location for the duration of the trial so that participants had 1.2 seconds to prepare  
13 their movement. During short-preparation time (Short-PT) trials, the target location  
14 abruptly switched to the opposite possible target position prior to the fourth tone  
15 (Figure 1a). The time at which the target switched locations was randomized for  
16 each Short-PT trial by sampling from a Gaussian distribution with a mean of 300 ms  
17 and a standard deviation of 25 ms. Short-PT trials were included among the more  
18 frequent Long-PT trials only during the first rotation and during the seventh and  
19 final rotation (Figure 1c). Within blocks where they were present, Short-PT trials  
20 were randomly interspersed among Long-PT trials such that for every 10 total trials,  
21 two were Short-PT (one to each target) and eight were Long-PT (four to each  
22 target). No Short-PT trials were permitted as the first or last trial in each sequence  
23 of 10 trials.

1

2 We also included an additional, Aftereffect probe (Figure 1d), designed to directly  
3 assess implicit recalibration. Prior to these probes, participants were explicitly  
4 instructed to aim directly for the presented target, rather than applying a strategy or  
5 deliberately aiming in a direction other than towards the target (Benson et al., 2011;  
6 Day et al., 2016; Morehead et al., 2015; Werner et al., 2015). Prior to these trials, text  
7 appeared on the participants' screen for 4.5 seconds reading: "On the next trial /  
8 take your time / and aim directly for the target". All participants were literate in  
9 English. Participants were also verbally instructed at the beginning of each session  
10 of the experiment that during these Aftereffect probe trials, no cursor would be  
11 visible, no audible tone sequence would sound, no movement initiation time  
12 constraints were in place, and they were to reach for the target as if they wanted  
13 their finger to intersect with the target.

14

15 A pair of Aftereffect probes, one for each target direction, followed each series of 10  
16 Long- or Short-PT trials in blocks when they were present (Figure 1c). In  
17 Experiment 1, Aftereffect probes were included in all blocks for which Short-PT  
18 trials were present, except for the initial familiarization block (Figure 1c).

19

20 Participants were instructed that for Long- and Short-PT trial types they were to  
21 prioritize the timing of their movement initiation. They were instructed to be as  
22 accurate as possible in hitting the target with the cursor, and to reach with a  
23 consistent, fast speed (between 4.5 cm/s and 13 cm/s). Feedback regarding

1 movement timing and movement speed was provided following every Long- and  
2 Short-PT trial through visual displays on the screen (similar to (Haith et al., 2015)).

3  
4 Cursor feedback during the movement was provided throughout each Long- and  
5 Short-PT trial. The cursor disappeared once participants reached 9 cm radially from  
6 the start position. The cursor was not visible during the return movement, until the  
7 participants' hand was within 2 cm of the start position. Any cursor manipulations  
8 (i.e. the rotations) were turned off during the inter-trial period. During Aftereffect  
9 probes, no cursor feedback was provided apart from during return movements.

10

### 11 *Experiment 2*

12 20 participants took part in Experiment 2, and 3 were excluded because 50% of  
13 their Short-PT trials were directed towards the wrong target. The reaching task and  
14 rotation schedule remained the same for Experiment 2 as in Experiment 1.  
15 Experiment 2 included Short-PT trials throughout the entire experiment, rather  
16 than just the first and final rotation cycles as had been the case for Experiment 1. No  
17 Aftereffect trials were included in Experiment 2. Experiment 2, like Experiment 1,  
18 was conducted in two sessions across two consecutive days.

19

### 20 *Data analysis*

21 All data were analyzed offline in Matlab (The Mathworks, Natick, MA) and in R (The  
22 R Project, [www.r-project.org](http://www.r-project.org)). Kinematic data were smoothed with a 2<sup>nd</sup>-order  
23 Savitzky-Golay interpolation filter with half width 54 ms. These smoothed signals

1 were then differentiated to obtain velocity. The time of movement initiation was  
2 determined by searching from the peak velocity backwards in time to find the last  
3 time at which tangential velocity exceeded a threshold of 2 cm/s. Reach direction  
4 was determined by computing the angle of the instantaneous velocity at 100 ms  
5 after movement onset. Trials during which participants either failed to reach or  
6 abruptly altered their initial reach direction after having reached 2 cm from the  
7 start position were excluded from analysis (on average, 5 trials were excluded per  
8 participant for this reason). This type of error was most likely to have occurred  
9 during Short-PT trials, due to participants initially moving towards the original  
10 target location. Participants were excluded from further analysis if fewer than 50%  
11 of their Short-PT trials were directed towards the correct target.

12

13 The initial learning rate during a given rotation cycle was quantified as the average  
14 compensation over the first few trials of that cycle. Following a similar approach as  
15 in (Haith et al., 2015), we assessed initial learning during Long-PT trials based on  
16 the mean reach direction over the initial eight Long-PT trials, though we exclude the  
17 first trial following rotation onset and any post-Aftereffect trials from this average.  
18 For Short-PT trials and Aftereffect probes, the average reach direction in the initial  
19 two trials of each type following rotation onset was taken as the initial learning  
20 measure. Similarly, the final eight trials (for Long-PT trials), and final two trials (for  
21 Short-PT and Aftereffect trials), in each rotation were averaged and used as a  
22 summary measure for asymptotic behavior (excluding post-Aftereffect trials).

23

1 For Experiment 1, a 2-way analysis of variance (ANOVA) test was conducted on the  
2 early adaptation measure, with trial type (Long PT, Short PT, and Aftereffect) and  
3 rotation cycle used as factors. In the event of an interaction between trial type and  
4 cycle, t-tests were planned to detect any difference among groups in early learning  
5 or asymptote during the first and the final rotation cycles, and to test for savings  
6 from the first to the final rotation cycle for each trial type. A linear mixed-effects  
7 model analysis was conducted for Experiment 2, using trial type (Long- and Short-  
8 PT), and cycle (cycles 1 to 6) as fixed effects, and subject as a random factor.

9

## 10 **Discussion**

11 Our experiments showed that repeated exposure to a pair of alternating rotations  
12 led to a qualitative change in the ability to express memory for adaptation. We  
13 measured the extent of implicit recalibration using Aftereffect trials and found,  
14 consistent with previous work, that implicit recalibration accounted for only a  
15 fraction of overall learning, implying the existence of additional re-aiming processes  
16 (Morehead et al., 2015; Taylor et al., 2014). Importantly, the rate of implicit  
17 recalibration remained invariant despite multiple exposures to the perturbation and  
18 clear savings in regular, Long-PT trials. This finding refutes suggestions that savings  
19 might be attributable to modulation of the sensitivity of implicit recalibration  
20 (Herzfeld et al., 2014).

21

22 The invariance of implicit recalibration despite practice was in contrast to what we  
23 observed in Short-PT trials in which preparation time was limited. During the first

1 cycle, limiting preparation time reduced overall compensation to an extent  
2 comparable to Aftereffect trials. This is consistent with the idea that limiting  
3 preparation time prohibited the use of a deliberate re-aiming strategy (Fernandez-  
4 Ruiz et al., 2011; Haith et al., 2015; Leow et al., 2017b). However, the effect of  
5 limiting preparation time diminished with practice. Participants became able to  
6 express the bulk of their learning regardless of allowed preparation time. Since this  
7 practice effect was not due to improved implicit recalibration, we conclude that it  
8 was attributable to participants becoming able to express their learning more  
9 rapidly and automatically.

10

11 This transformation is consistent with more general theories of motor skill learning  
12 that posit a transition from deliberate to automatic modes of control following  
13 practice (Anderson, 1982; Ashby and Crossley, 2012; Economides et al., 2015; Fitts  
14 and Posner; Fitts, Paul M., 1964; Honda et al., 1998; Moors and De Houwer, 2006).  
15 The transition from deliberate to automatic control is more usually established  
16 through dual-task paradigms, which allow the reliance on cognitive resources to be  
17 measured at different points during learning (Schneider and Shiffrin, 1977). In  
18 addition to a reduction in cognitive load, automaticity has also been characterized in  
19 terms of processing speed, and whether or not responses are obligatory (Cohen et  
20 al., 1992; Logan, 1980). These other facets of automatic behavior have been  
21 relatively little studied in comparison to effects associated with cognitive load, and  
22 it is unclear exactly how these effects of practice are inter-related. We suggest that  
23 limiting response times might offer an alternative, perhaps more powerful approach

1 to investigate these effects. Restricting preparation time has been demonstrated to  
2 limit deliberative reasoning in more abstract decision-making tasks (Keramati et al.,  
3 2011). We have also recently used a similar approach to establish that learned  
4 motor responses become faster and become habitual through practice (Hardwick et  
5 al., 2017). Future work will be necessary to fully understand the relationship  
6 between processing time, cognitive load, and whether or not responses are habitual.

7

### 8 *Overcoming interference through automaticity*

9 A key difference from our previous work exploring the influence of movement  
10 preparation time on the expression of savings (Haith et al., 2015) is in the way we  
11 washed out participants' learning in between exposures to the perturbation(s).  
12 Previously, we washed out participants by switching off the perturbation for 20  
13 trials and allowing participants an overnight break. In this set of experiments, we  
14 washed participants out by imposing a counter-perturbation followed by no  
15 perturbation. We found this be an effective means of ensuring that behavior  
16 returned to a fixed baseline in all trial types, allowing us to directly compare the  
17 response to the introduction of the perturbation across cycles.

18

19 Imposing a counter-perturbation (perturbation B) also created the possibility of  
20 interference between memories for the two perturbations (Krakauer et al., 2005).  
21 Indeed, we found that the extent of savings in regular, Long-PT trials was weaker  
22 than is typical in adaptation experiments, suggesting partial interference. This  
23 interference was fully overcome with practice alternating between different

1 perturbations, as would be expected based on classical experiments on adapting to  
2 alternating visual shifts induced by prisms (Martin et al., 1996b). Experiment 2  
3 revealed that the ability to overcome interference became established over roughly  
4 the same time course as the emergence of savings in Short-PT trials, suggesting that  
5 automatization might have been critical to the ability to overcome interference  
6 effects. This is consistent with the suggestion that interference might be a cognitive  
7 phenomenon, brought about by blocking retrieval of a learned compensation  
8 strategy (Krakauer et al., 2005; Yin and Wei, 2014). Automated compensation  
9 strategies might be less vulnerable to such cognitive interference effects than  
10 deliberate strategies, hence enabling savings for both rotation directions.

11

12 *If skill learning is initially declarative, how can patients with amnesia learn new motor*  
13 *skills?*

14 Perhaps no experimental result has influenced motor learning theory more than  
15 that of patient H.M: despite severe anterograde and retrograde amnesia, H.M. and  
16 other patients like him were capable of learning novel motor abilities like mirror  
17 drawing, despite having no recollection of ever having done the practiced tasks  
18 (Cohen and Squire, 1980; Milner, 1962). These findings directly gave rise to the  
19 deeply embedded notion that motor skills are procedural, and distinct from  
20 declarative memory systems (Cohen and Squire, 1980). How can the H.M. result be  
21 reconciled with our model of a transformation from deliberate to automatic control?  
22 The answer, we suggest, is that the processes needed for deliberate control are in  
23 fact intact in amnesic patients (Schacter et al., 1982; Squire and Zola, 1998; Tulving,



1 1985), even though the ability to build long-term memories for these processes is  
2 impaired. Amnesic patients are unimpaired at most cognitive tasks and basic  
3 reasoning abilities (Schacter et al., 1982, 1982; Squire and Zola, 1998; Tulving,  
4 1985), provided the tasks do not require holding specific facts in memory beyond  
5 the capacity of their short-term memory. H.M. could have been able to gradually  
6 learn new skills by rapidly automatizing fragments of the skill within each session.  
7 These automatized fragments *could* then have been retrieved in subsequent  
8 sessions, leaving less work for deliberate control. Iterating this fragmentary  
9 automatization and retrieval would ultimately allow a new, deliberate skill to be  
10 gradually acquired and retained across sessions, even though the skill initially  
11 depended on declarative processes.

12

### 13 *Relationship between adaptation and motor skill learning*

14 Our findings help to clarify the relationship between adaptation and motor skill  
15 learning. Adaptation paradigms, along with other similar cerebellum-dependent  
16 forms of motor learning, like smooth pursuit (Yang and Lisberger, 2014), are often  
17 considered to represent models of motor learning in a general sense. However, the  
18 relationship of simple adaptation tasks to more complex real-world skills is  
19 questionable (Krakauer and Mazzoni, 2011; Wulf and Shea, 2002). Adaptation  
20 occurs in minutes, whereas real-world skills are learned over days, weeks or  
21 months. Adaptation tasks can be solved perfectly through instruction (Mazzoni and  
22 Krakauer, 2006), unlike real-world skills where extensive practice is typically  
23 necessary even if the required actions are easily communicable. Furthermore,

1 adaptation is a transient state that, unlike other skills, tends to deteriorate rather  
2 than consolidate with the passage of time (Kitago et al., 2013).

3

4 The relevance of adaptation to motor skill learning hinges on the phenomenon of  
5 savings, which represents the only real long-term memory associated with  
6 adaptation. Recent results showing that savings is largely attributable to retrieval of  
7 deliberate aiming strategies (Haith et al., 2015; Morehead et al., 2015) therefore  
8 cause significant difficulty for the idea that adaptation might in some way model the  
9 acquisition of more general motor skills. Our findings offer a potential  
10 reconciliation, showing that a compensatory strategy that is initially applied  
11 deliberately can be applied automatically following practice. This transition mirrors  
12 the transition from declarative to procedural memory that has commonly been  
13 invoked in theories of skill learning (Anderson, 1982; Fitts and Posner). Thus, in a  
14 restricted sense, adaptation paradigms do encompass a model of more general skill  
15 learning processes. Nevertheless, the presence of implicit recalibration, which  
16 appears to be insensitive to practice-related effects, actually significantly  
17 complicates behavior in such paradigms. We suggest that skill learning might be  
18 better studied in paradigms that more effectively isolate the deliberate-to-automatic  
19 transition.

20

21 **Acknowledgements**

1 Thanks to members of the BLAM lab for helpful criticism and discussion. We thank  
2 Aaron Wong, Alex Forrence, Reza Shadmehr, and Amy Bastian.

3

#### 4 **References**

5 Anderson, J. (1982). Acquisition of cognitive skill. *Psychol. Rev.* *89*.

6 Ashby, F.G., and Crossley, M.J. (2012). Automaticity and multiple memory systems.  
7 *Wiley Interdiscip. Rev. Cogn. Sci.* *3*, 363–376.

8 Benson, B.L., Anguera, J.A., and Seidler, R.D. (2011). A spatial explicit strategy reduces  
9 error but interferes with sensorimotor adaptation. *J. Neurophysiol.* *105*, 2843–2851.

10 Brashers-Krug, T., Shadmehr, R., and Bizzi, E. (1996). Consolidation in human motor  
11 memory. *Nature* *382*, 252–255.

12 Cohen, N.J., and Squire, L.R. (1980). Preserved learning and retention of pattern-  
13 analyzing skill in amnesia: dissociation of knowing how and knowing that. *Science* *210*,  
14 207–210.

15 Cohen, J.D., Servan-Schreiber, D., and McClelland, J.L. (1992). A Parallel Distributed  
16 Processing Approach to Automaticity. *Am. J. Psychol.* *105*, 239–269.

17 Cunningham, H.A. (1989). Aiming error under transformed spatial mappings suggests a  
18 structure for visual-motor maps. *J. Exp. Psychol. Hum. Percept. Perform.* *15*, 493.

19 Day, H.R., and Singer, G. (1967). Sensory adaptation and behavioral compensation with  
20 spatially transformed vision and hearing. *Psychol. Bull.* *67*, 307–322.

21 Day, K.A., Roemmich, R.T., Taylor, J.A., and Bastian, A.J. (2016). Visuomotor Learning  
22 Generalizes Around the Intended Movement. *eNeuro* *3*, ENEURO.0005-16.2016.

23 Ebbinghaus, H. (1913). *Memory* (HA Ruger & CE Bussenius, Trans.). N. Y. Columbia  
24 Univ. Teach. Coll. Work Publ. 1885.

25 Economides, M., Kurth-Nelson, Z., Lübbert, A., Guitart-Masip, M., and Dolan, R.J.  
26 (2015). Model-Based Reasoning in Humans Becomes Automatic with Training. *PLOS*  
27 *Comput. Biol.* *11*, e1004463.

28 Fernandez-Ruiz, J., Wong, W., Armstrong, I.T., and Flanagan, J.R. (2011). Relation  
29 between reaction time and reach errors during visuomotor adaptation. *Behav. Brain Res.*  
30 *219*.

31 Fitts, P., and Posner, M. *Human performance*.

- 1 Fitts, Paul M. (1964). Perceptual Motor Skill Learning. In *Categories of Human*  
2 *Learning*, A.W. Melton, ed. (New York, NY: Academic Press Inc.), pp. 244–283.
- 3 Gonzalez Castro, L.N., Hadjiosif, A.M., Hemphill, M.A., and Smith, M.A. (2014).  
4 Environmental consistency determines the rate of motor adaptation. *Curr. Biol. CB 24*,  
5 1050–1061.
- 6 Hadjiosif, A., and Smith, M.A. (2013). Savings is restricted to the temporally labile  
7 component of motor adaptation.
- 8 Haith, A.M., and Krakauer, J.W. (2014). Motor Learning: The Great Rate Debate. *Curr.*  
9 *Biol. 24*, R386–R388.
- 10 Haith, A.M., Huberdeau, D.M., and Krakauer, J.W. (2015). The Influence of Movement  
11 Preparation Time on the Expression of Visuomotor Learning and Savings. *J. Neurosci.*  
12 *35*, 5109–5117.
- 13 Hardwick, R.M., Forrence, A.D., Krakauer, J.W., and Haith, A.M. (2017). Skill  
14 Acquisition and Habit Formation as Distinct Effects of Practice. *bioRxiv 201095*.
- 15 Herzfeld, D.J., Vaswani, P.A., Marko, M.K., and Shadmehr, R. (2014). A memory of  
16 errors in sensorimotor learning. *Science 345*, 1349–1353.
- 17 Honda, M., Deiber, M.P., Ibáñez, V., Pascual-Leone, A., Zhuang, P., and Hallett, M.  
18 (1998). Dynamic cortical involvement in implicit and explicit motor sequence learning. A  
19 PET study. *Brain 121*, 2159–2173.
- 20 Huang, V.S., Haith, A., Mazzoni, P., and Krakauer, J.W. (2011). Rethinking motor  
21 learning and savings in adaptation paradigms: model-free memory for successful actions  
22 combines with internal models. *Neuron 70*.
- 23 Huberdeau, D.M., Krakauer, J.W., and Haith, A.M. (2015a). Dual-process decomposition  
24 in human sensorimotor adaptation. *Curr. Opin. Neurobiol. 33*, 71–77.
- 25 Huberdeau, D.M., Haith, A.M., and Krakauer, J.W. (2015b). Formation of a long-term  
26 memory for visuomotor adaptation following only a few trials of practice. *J.*  
27 *Neurophysiol. 114*, 969–977.
- 28 Joiner, W.M., and Smith, M.A. (2008). Long-term retention explained by a model of  
29 short-term learning in the adaptive control of reaching. *J. Neurophysiol. 100*, 2948–2955.
- 30 Keramati, M., Dezfouli, A., and Piray, P. (2011). Speed/Accuracy Trade-Off between the  
31 Habitual and the Goal-Directed Processes. *PLOS Comput. Biol. 7*, e1002055.
- 32 Kitago, T., Ryan, S.L., Mazzoni, P., Krakauer, J.W., and Haith, A.M. (2013). Unlearning  
33 versus savings in visuomotor adaptation: comparing effects of washout, passage of time,  
34 and removal of errors on motor memory. *Front. Hum. Neurosci. 7*, 307.

- 1 Kluzik, J., Diedrichsen, J., Shadmehr, R., and Bastian, A.J. (2008). Reach Adaptation:  
2 What Determines Whether We Learn an Internal Model of the Tool or Adapt the Model  
3 of Our Arm? *J. Neurophysiol.* *100*, 1455–1464.
- 4 Kojima, Y., Iwamoto, Y., and Yoshida, K. (2004). Memory of learning facilitates  
5 saccadic adaptation in the monkey. *J. Neurosci. Off. J. Soc. Neurosci.* *24*, 7531–7539.
- 6 Krakauer, J.W., and Mazzoni, P. (2011). Human sensorimotor learning: adaptation, skill,  
7 and beyond. *Curr. Opin. Neurobiol.* *21*, 636–644.
- 8 Krakauer, J.W., Ghilardi, M.-F., and Ghez, C. (1999). Independent learning of internal  
9 models for kinematic and dynamic control of reaching. *Nat. Neurosci.* *2*, 1026–1031.
- 10 Krakauer, J.W., Pine, Z.M., Ghilardi, M.-F., and Ghez, C. (2000). Learning of  
11 visuomotor transformations for vectorial planning of reaching trajectories. *J. Neurosci.*  
12 *20*, 8916–8924.
- 13 Krakauer, J.W., Ghez, C., and Ghilardi, M.F. (2005). Adaptation to visuomotor  
14 transformations: consolidation, interference, and forgetting. *J. Neurosci. Off. J. Soc.*  
15 *Neurosci.* *25*, 473–478.
- 16 Lackner, J.R., and Lobovits, D. (1977). Adaptation to displaced vision: evidence for  
17 prolonged after-effects. *Q. J. Exp. Psychol.* *29*, 65–69.
- 18 Leow, L.-A., Marinovic, W., Riek, S., and Carroll, T.J. (2017a). Cerebellar anodal tDCS  
19 increases implicit learning when strategic re-aiming is suppressed in sensorimotor  
20 adaptation. *PLOS ONE* *12*, e0179977.
- 21 Leow, L.-A., Gunn, R., Marinovic, W., and Carroll, T.J. (2017b). Estimating the implicit  
22 component of visuomotor rotation learning by constraining movement preparation time.  
23 *J. Neurophysiol.* jn.00834.2016.
- 24 Logan, G.D. (1980). Attention and automaticity in Stroop and priming tasks: Theory and  
25 data. *Cognit. Psychol.* *12*, 523–553.
- 26 Martin, T.A., Keating, J.G., Goodkin, H.P., Bastian, A.J., and Thach, W.T. (1996a).  
27 Throwing while looking through prisms. *Brain* *119*, 1199–1211.
- 28 Martin, T.A., Keating, J.G., Goodkin, H.P., Bastian, A.J., and Thach, W.T. (1996b).  
29 Throwing while looking through prisms. I. Focal olivocerebellar lesions impair  
30 adaptation. *Brain J. Neurol.* *119 (Pt 4)*, 1183–1198.
- 31 Mazzoni, P., and Krakauer, J.W. (2006). An implicit plan overrides an explicit strategy  
32 during visuomotor adaptation. *J. Neurosci.* *26*, 3642–3645.
- 33 Milner, B. (1962). Les troubles de la memoire accompagnant des lesions hippocampiques  
34 bilaterales. In *Physiologie de L'hippocampe*, (Paris: Centre National de la Recherche  
35 Scientifique), pp. 257–272.

- 1 Moors, A., and De Houwer, J. (2006). Automaticity: a theoretical and conceptual  
2 analysis. *Psychol. Bull.* *132*, 297–326.
- 3 Morehead, J.R., Qasim, S.E., Crossley, M.J., and Ivry, R. (2015). Savings upon Re-  
4 Aiming in Visuomotor Adaptation. *J. Neurosci.* *35*, 14386–14396.
- 5 Schacter, D.L., Wang, P.L., Tulving, E., and Freedman, M. (1982). Functional retrograde  
6 amnesia: A quantitative case study. *Neuropsychologia* *20*, 523–532.
- 7 Schneider, W., and Shiffrin, R. (1977). Controlled and automatic human information  
8 processing: I. Detection, search, and attention. *Psychol. Rev.* *84*, 1–66.
- 9 Shadmehr, R., and Mussa-Ivaldi, F.A. (1994). Adaptive representation of dynamics  
10 during learning of a motor task. *J. Neurosci.* *14*, 3208–3224.
- 11 Squire, L.R., and Zola, S.M. (1998). Episodic memory, semantic memory, and amnesia.  
12 *Hippocampus* *8*, 205–211.
- 13 Taylor, J.A., Klemfuss, N.M., and Ivry, R.B. (2010). An Explicit Strategy Prevails When  
14 the Cerebellum Fails to Compute Movement Errors. *Cerebellum Lond. Engl.* *9*, 580–586.
- 15 Taylor, J.A., Krakauer, J.W., and Ivry, R.B. (2014). Explicit and Implicit Contributions to  
16 Learning in a Sensorimotor Adaptation Task. *J. Neurosci.* *34*, 3023–3032.
- 17 Tulving, E. (1985). Memory and consciousness. *Can. Psychol. Can.* *26*, 1–12.
- 18 Villalta, J.I., Landi, S.M., Flo, A., and Della-Maggiore, V. (2013). Extinction Interferes  
19 with the Retrieval of Visuomotor Memories Through a Mechanism Involving the  
20 Sensorimotor Cortex. *Cereb. Cortex N. Y. N* 1991.
- 21 Welch, R.B., Bridgeman, B., Anand, S., and Browman, K.E. (1993). Alternating prism  
22 exposure causes dual adaptation and generalization to a novel displacement. *Percept.*  
23 *Psychophys.* *54*, 195–204.
- 24 Werner, S., and Bock, O. (2010). Mechanisms for visuomotor adaptation to left–right  
25 reversed vision. *Hum. Mov. Sci.* *29*, 172–178.
- 26 Werner, S., Aken, B.C. van, Hulst, T., Frens, M.A., Geest, J.N. van der, Strüder, H.K.,  
27 and Donchin, O. (2015). Awareness of Sensorimotor Adaptation to Visual Rotations of  
28 Different Size. *PLOS ONE* *10*, e0123321.
- 29 Wolpert, D.M., Ghahramani, Z., and Jordan, M.I. (1995). An internal model for  
30 sensorimotor integration. *Science* *269*, 1880–1882.
- 31 Wulf, G., and Shea, C.H. (2002). Principles derived from the study of simple skills do not  
32 generalize to complex skill learning. *Psychon. Bull. Rev.* *9*, 185–211.

1 Yang, Y., and Lisberger, S.G. (2014). Role of plasticity at different sites across the time  
2 course of cerebellar motor learning. *J. Neurosci. Off. J. Soc. Neurosci.* *34*, 7077–7090.

3 Yin, C., and Wei, K. (2014). Interference from mere thinking: mental rehearsal  
4 temporarily disrupts recall of motor memory. *J. Neurophysiol.* *112*, 594–602.

5 Zarahn, E., Weston, G.D., Liang, J., Mazzoni, P., and Krakauer, J.W. (2008). Explaining  
6 savings for visuomotor adaptation: linear time-invariant state-space models are not  
7 sufficient. *J. Neurophysiol.* *100*, 2537–2548.

8

9

## Supplemental Figure 1

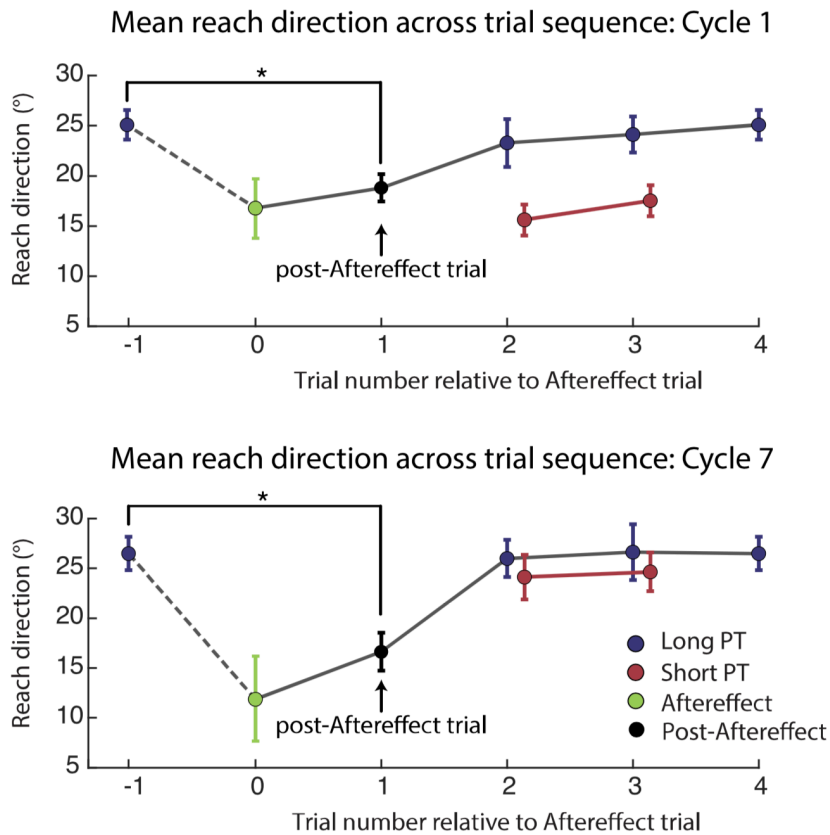

1

2 Supplemental Figure 1: Behavior following aftereffect trials. Top panel: Mean performance  
3 surrounding Aftereffect trial (trial 0). Black circles represent Long-PT trials that occurred  
4 immediately after the Aftereffect trial. Blue circles represent mean performance in Long-PT  
5 trials at other positions relative to the Aftereffect trial. Red circles represent mean performance  
6 in the first Short-PT trial after each Aftereffect trial (which occurred either 2 or 3 trials later).  
7 Bottom Panel: As Top Panel, but for Cycle 7. \*indicates  $p < 0.05$

8
